# Supplementary material
Source: Springer Nature journal article supplement (https://www.springermedizin.de/resource/supplementary/13014_2010_306_MOESM4_ESM.pdf/9633152)

**A**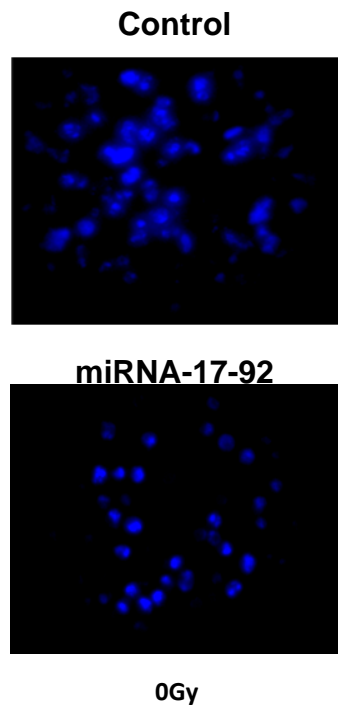**B**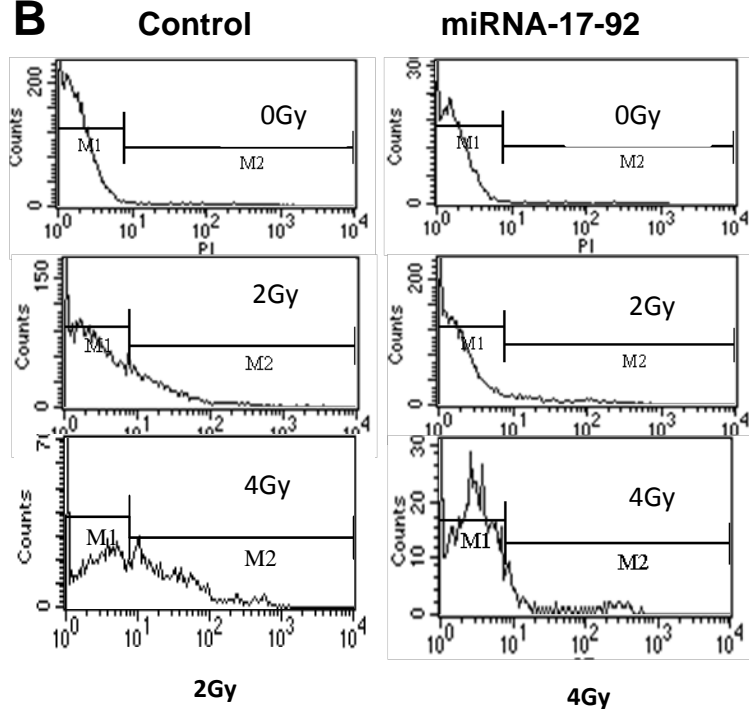**C**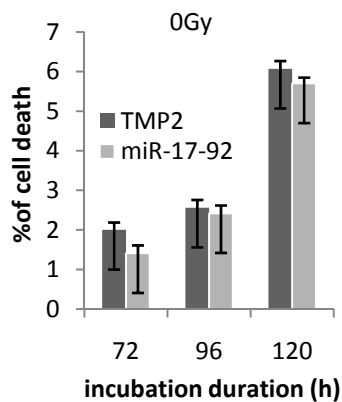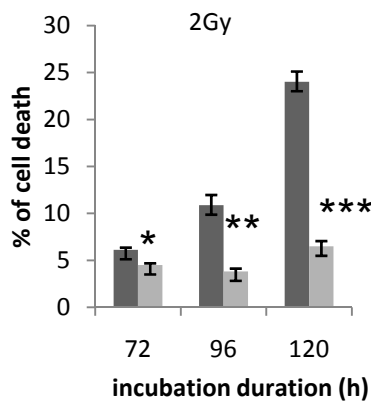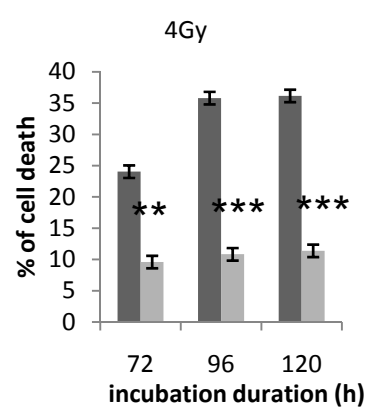

Supplement: MOESM4 [file 9633152]
